# Supplementary material
Source: MDPI journal article supplement (https://www.mdpi.com/2073-4344/10/2/167)
Supplement: s1 [file s1]

## (Supplementary Material)

### 2D Mesoporous Channels of PMO; a Platform for Cluster-Like Pt Synthesis and Catalytic Activity in Nitrophenol Reduction

Mohamed Esmat <sup>1,2,3</sup>, Hamed Mohtasham <sup>4</sup>, Yasser GadelHak <sup>3</sup>, Reza Tarbiat Mehrebani <sup>4</sup>, Rafat Tahawy <sup>1</sup>, Sadegh Rostamnia <sup>4,\*</sup>, Naoki Fukata <sup>1,2</sup>, Samad Khaksar <sup>5</sup> and Esmail Doustkhah <sup>1,4,\*</sup>

<sup>1</sup> International Center for Materials Nanoarchitectonics (MANA), National Institute for Materials Science (NIMS), 1-1 Namiki, Tsukuba, Ibaraki 305-0044, Japan;

<sup>2</sup> Graduate School of Pure and Applied Sciences, University of Tsukuba, Tsukuba, Ibaraki 305-8573, Japan

<sup>3</sup> Materials Science and Nanotechnology Department, Faculty of Postgraduate Studies for Advanced Sciences (PSAS), Beni-Suef University, 62511 Beni-Suef, Egypt;

<sup>4</sup> Organic and Nano Group (ONG), Department of Chemistry, University of Maragheh, 55181-83111, Maragheh, Iran;

<sup>5</sup> Department of Chemistry, School of Science and Technology, The University of Georgia, Tbilisi, Georgia;

\* Correspondence: srostamnia@gmail.com (S.R.); doustkhah.esmail@nims.go.jp (E. D.)

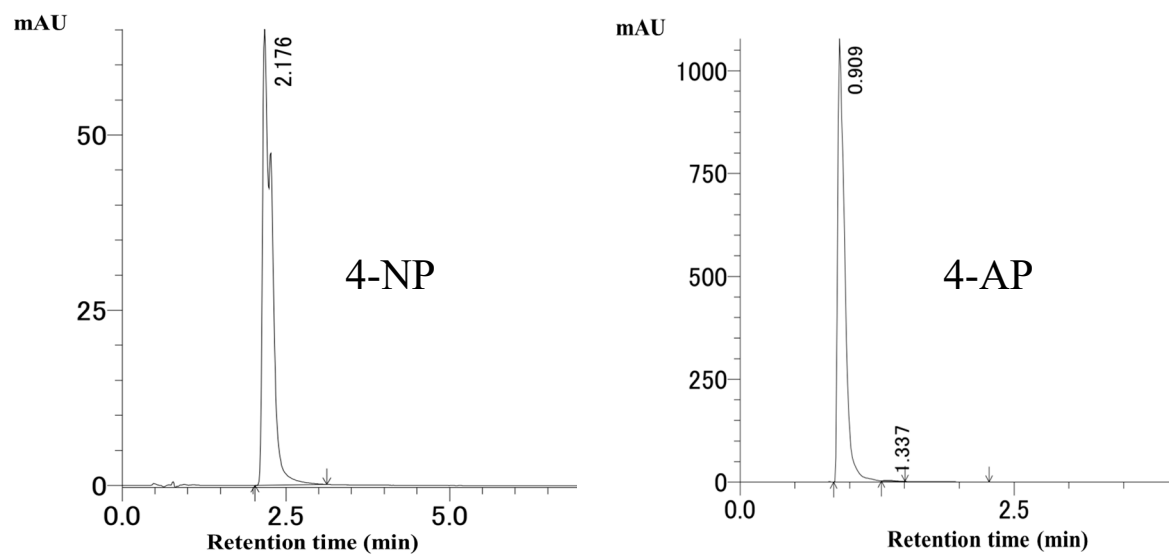

**Figure S1:** HPLC chromatograph of 4-nitrophenol (4-NP) and 4-aminophenol (4-AP)
